# Supplementary material
Source: publisher figshare collection journal article supplement (https://tandf.figshare.com/articles/dataset/_/10832687)
Supplement: Supplementary file 1 [file 2]

# Supplementary Information

## Spatial modelling of cumulative human pressure in the tropical coastscape of Zanzibar, Tanzania

ZA Khamis, R Kalliola and N Käyhkö

*African Journal of Marine Science* 41(4): 337–352

<https://doi.org/10.2989/1814232X.2019.1667436>

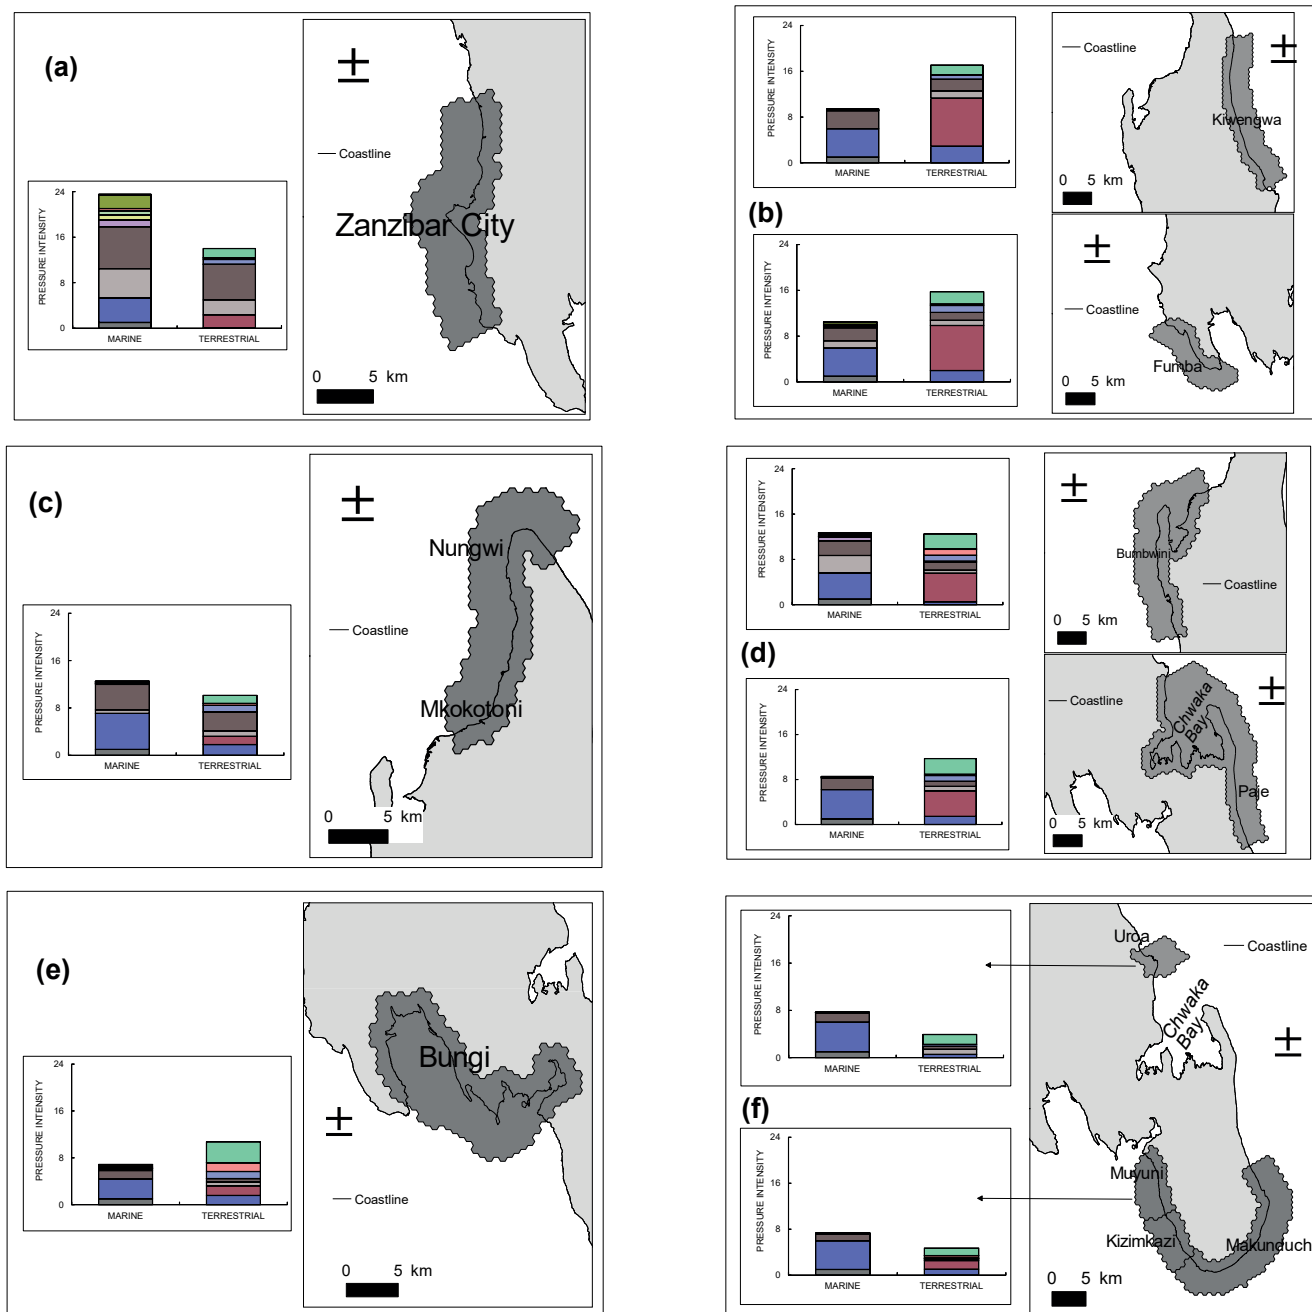

**Figure S1:** Six different marine–terrestrial combinations of human-pressure levels in the coastscape of Zanzibar's main island (Unguja), Tanzania, western Indian Ocean: (a) high cumulative pressure on both the terrestrial and marine environments; (b) high and moderate cumulative pressure on the terrestrial and marine environments, respectively; (c) moderate and high cumulative pressure on the terrestrial and marine environments, respectively; (d) moderate cumulative pressure on both the terrestrial and marine environments; (e) moderate and low cumulative pressure on the terrestrial and marine environments, respectively; and (f) low cumulative pressure on both the terrestrial and marine environments. A common key for all panels is given in (g). The coastscape was designated as extending 1 km landward and 3 km seaward of the high-water mark
